# Supplementary material
Source: publisher figshare collection journal article supplement (https://acs.figshare.com/ndownloader/files/3843670)
Supplement: Supplementary file 1 [file 3843670]

# Supporting Information:

## Photo-Oxidation of Water on Defective Hematite(0001)

Manh-Thuong Nguyen,<sup>\*,†</sup> Simone Piccinin,<sup>‡</sup> Nicola Seriani,<sup>†</sup> and Ralph Gebauer<sup>†</sup>

*The Abdus Salam International Centre for Theoretical Physics,  
Strada Costiera 11, 34151 Trieste, Italy , and CNR-IOM DEMOCRITOS Simulation Center,  
34136 Trieste, Italy*

E-mail: mtnguyen@ictp.it

We have carried out density of states (DOS) calculations for the defect-free, O vacancy and N-doped systems using fully relaxed symmetric  $2 \times 2$  slabs (e.g., Figure S2).

In agreement with a previous density-functional (PBE+U) work,<sup>1</sup> our calculations show that there are gap states appearing in the case of the defect-free surface, typically, states are located around the Fermi level.

O vacancies or N dopants make the surface states close to the Fermi level less pronounced, however, the gap states become slightly more dispersed. To estimate the number of gap states we determine  $n = \int_{E_1}^{E_2} DOS(\epsilon) d\epsilon$ , where the same energy window  $[E_1, E_2]$  is indicated by arrows in Figure S1. We found that the ideal and O vacancy surfaces have

---

<sup>\*</sup>To whom correspondence should be addressed

<sup>†</sup>The Abdus Salam International Centre for Theoretical Physics,  
Strada Costiera 11, 34151 Trieste, Italy

<sup>‡</sup>CNR-IOM DEMOCRITOS Simulation Center, 34136 Trieste, Italy

similar gap states, about 34 states (per unit cell), while the N doped surface has about 31. These data suggest that O vacancies or N dopants do not produce more gap states, but modify the distribution of gap states of the ideal surface.

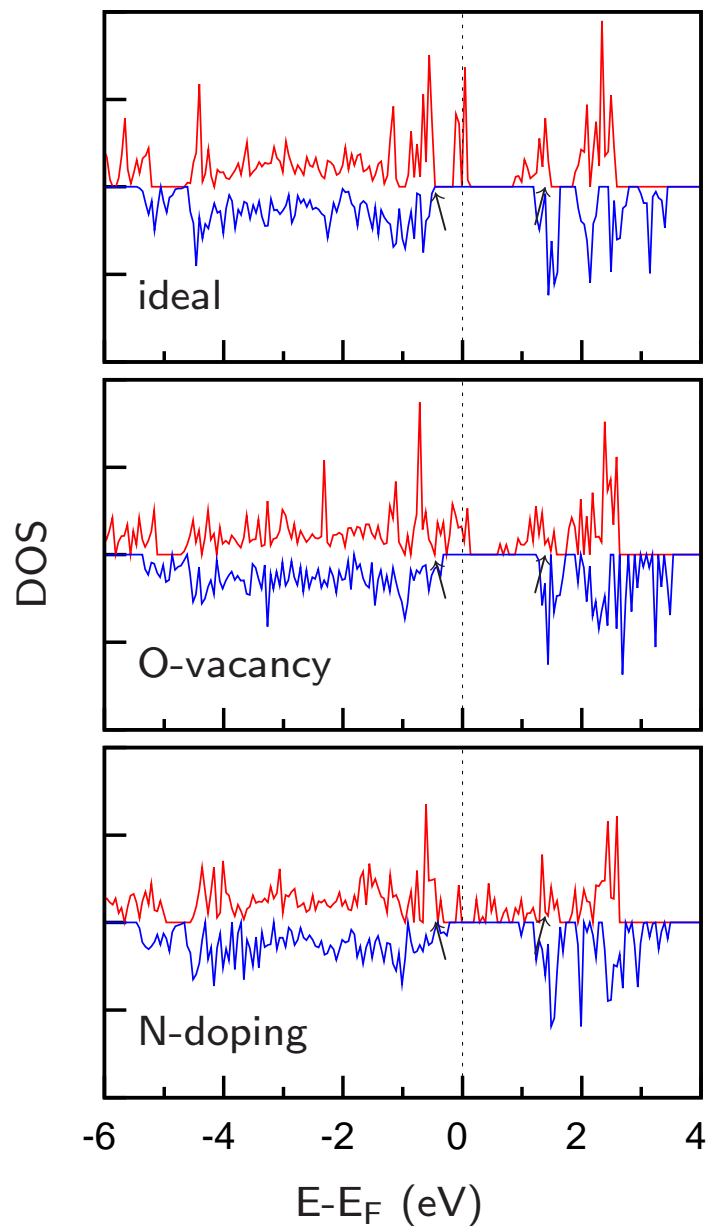

Figure S1: DOS of the ideal, O vacancy and N-doped systems, the Fermi level is set at zero. The arrows indicate the energy gap.

To see if the O vacancy or N dopant directly contributes to the gap states we calculate the integrated local density of states (ILDOS) in the energy window  $[E_1, E_2]$  marked by arrows in Figure S1:

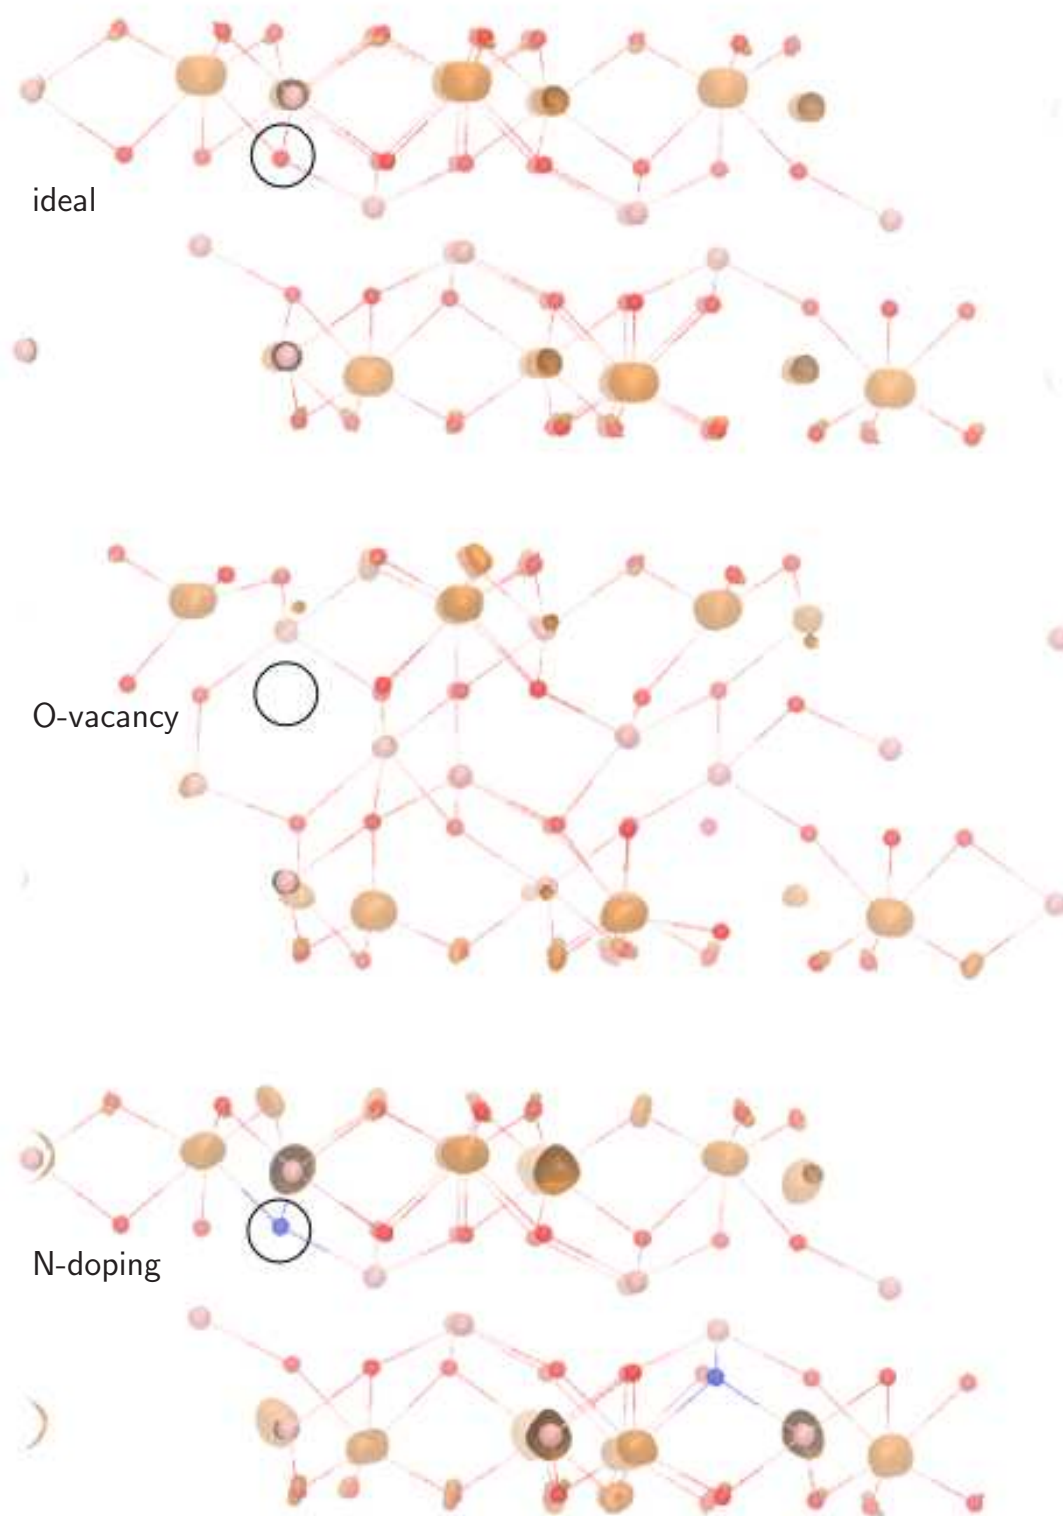

Figure S2: ILDOS (orange, isosurface value at 0.2 au) of the defect-free, O vacancy, and N doped surfaces. The black circles indicate the native O atom, the O vacancy and the N dopant.

$$ILDOS(\mathbf{r}) = \int_{E_1}^{E_2} LDOS(\mathbf{r}, \epsilon) d\epsilon, \quad (1)$$

where the local density of states LDOS is given by

$$LDOS(\mathbf{r}, \epsilon) = |\psi(\mathbf{r}, \epsilon)|^2 \quad (2)$$

In Figure S2 we show the ILDOS of the three cases. In the defect-free case, the gap states mainly contributed by the outermost O and Fe atoms. In the case of O vacancy or N dopant, gap states are also mainly from the outermost O and Fe atoms, and clearly, the no gap state is contributed by the O vacancy or N dopant.

## References

- (1) Kiejna. A.; Pabisiak, T. Surface properties of clean and Au or Pd covered hematite ( $\alpha$ -Fe<sub>2</sub>O<sub>3</sub>) (0001). *J. Phys.: Condens. Matter* **2012**, 24, 095003
